# Supplementary material for: PTEBL Teaching Method Combined with Caesar (Trauma Patient Simulator) Versus Traditional Teaching Method in The Training of Outstanding Doctoral Candidates in STB Skills: A Randomized Controlled Trial
Source: Research Square preprint supplement (doi:10.21203/rs.3.rs-1050865/v1), 2021-12-15
Supplement: Supplementary file 1 [file d47eccf8a63f94412dded000.xls]

## Sheet: Sheet1
Table 2 Willingness to rescue at the first scene of trauma bleeding
Variable	N (%) of Participants(n=78)						P Value*
	Experimental group, n (%)			Control group, n (%)
	Pre-course	Post-course	P Value	Pre-course	Post-course	P Value
Have the willingness to stop bleeding in a real-life emergency	23	39	<0.001	16	32	<0.001	0.66
	-52.3	-88.6		-47.1	-94.1
* Comparison between the experimental group and the control group post-course.
